# Supplementary material for: MicroRNA-300 Regulates the Ubiquitination of PTEN through the CRL4BDCAF13 E3 Ligase in Osteosarcoma Cells
Source: PubMed Central journal article supplement — Mol Ther Nucleic Acids. 2017 Dec 22;10:254–68. doi: 10.1016/j.omtn.2017.12.010 (PMC5768150; doi:10.1016/j.omtn.2017.12.010), 2017-12-22
Supplement: mmc1.pdf [file mmc1.pdf]

OMTN, Volume 10

## Supplemental Information

### **MicroRNA-300 Regulates the Ubiquitination of PTEN through the CRL4B<sup>DCAF13</sup> E3 Ligase in Osteosarcoma Cells**

**Zhi Chen, Wei Zhang, Kaibiao Jiang, Bin Chen, Kun Wang, Lifeng Lao, Canglong Hou, Fei Wang, Caiguo Zhang, and Hongxing Shen**

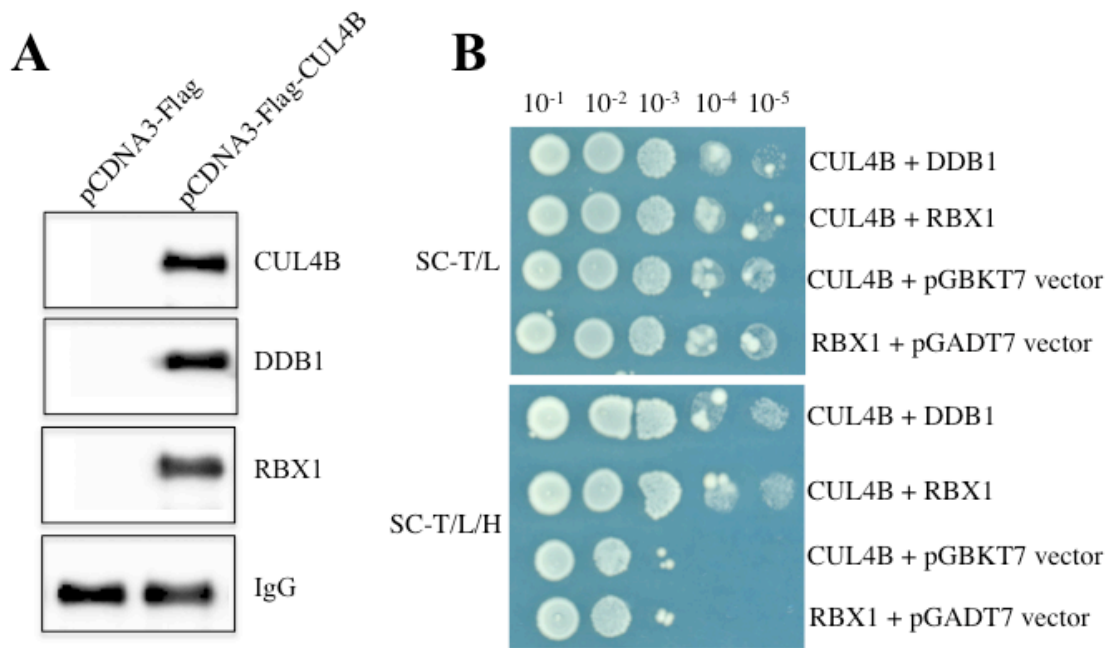

**Fig. S1 CUL4B formed a complex with DDB1 and RBX1 *in vivo* and *in vitro*.**

**(A)** CUL4B formed a complex with DDB1 and RBX1 *in vivo*. The *pCDNA3-Flag-CUL4B* vector was transfected into U2OS cells; then, Flag-tagged CUL4B was immunoprecipitated. The protein levels of CUL4B, DDB1, and RBX1 were determined by western blot analysis. The *pCDNA3-Flag* empty vector was used as a negative control, and IgG was used as a loading control. **(B)** CUL4B formed a complex with DDB1 and RBX1 in yeast cells. The *pGADT7-CUL4B* plasmid was co-transformed with *pGBKT7-DDB1* or *pGBKT7-RBX1* into AH109 cells. Cell growth was determined in media without Trp and Leu (SC-T/L) (top panel) or without Trp, Leu and His (SC-H/T/L) (bottom panel). Columns in each panel represent the serial decimal dilutions.

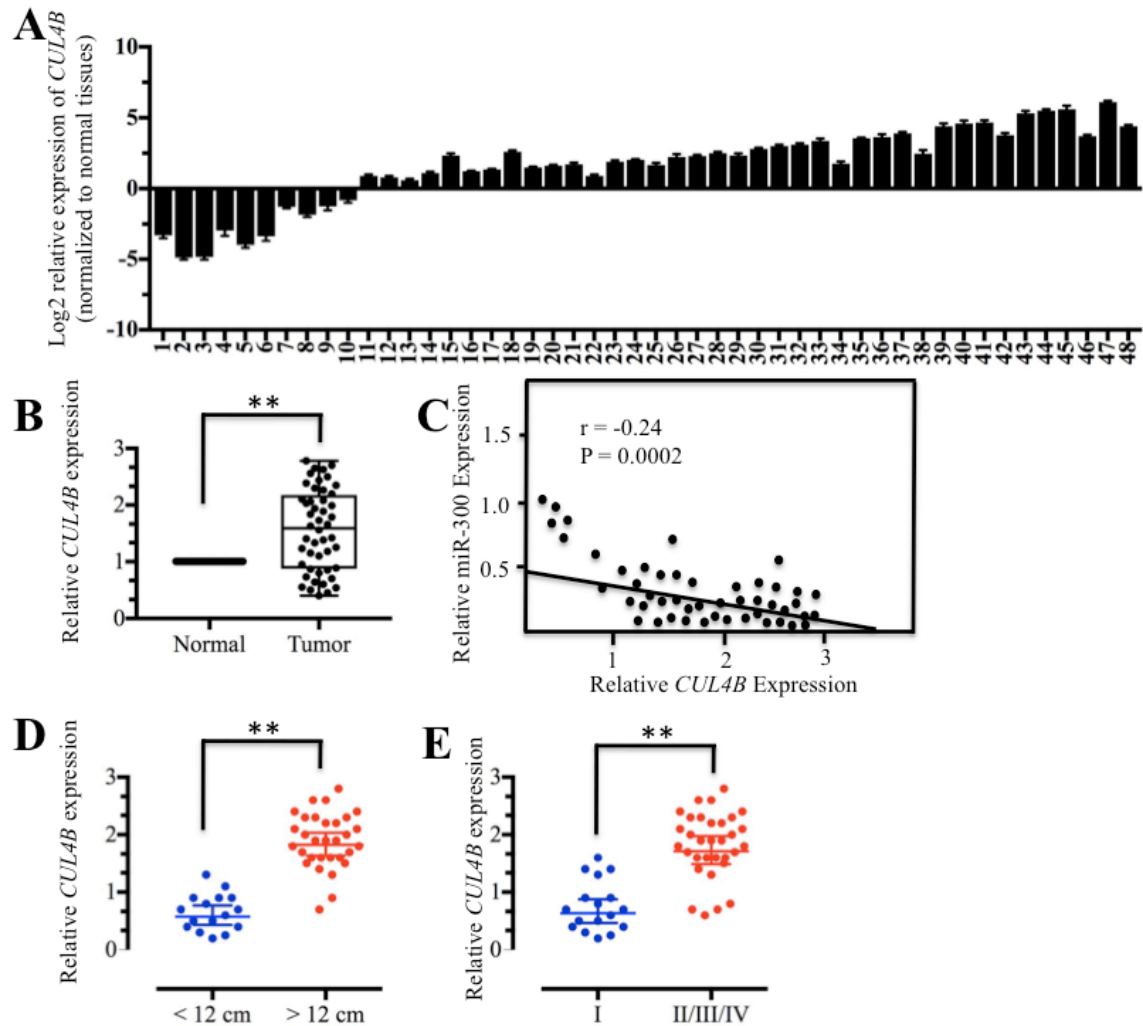

**Fig. S2** *CUL4B* expression was negatively associated with miR-300 level.

(A-B) Expression of *CUL4B* in osteosarcoma cancerous tissues is shown. Relative expression of *CUL4B* in osteosarcoma tumors (n = 48) was normalized to corresponding adjacent normal tissues (n = 48). (C) The expression of *CUL4B* was negatively correlated with miR-300 level. (D-E) The expression of *CUL4B* was positively correlated with osteosarcoma tumor size and MSTS stage. The expression of *CUL4B* was significantly higher in larger tumors (tumor maximal diameter  $\geq 12$  cm) (D) and was significantly higher in osteosarcoma patients with advanced MSTS stages (II/III/IV) than in those with an early MSTS stage (I) (E). \*\*  $P < 0.001$ .

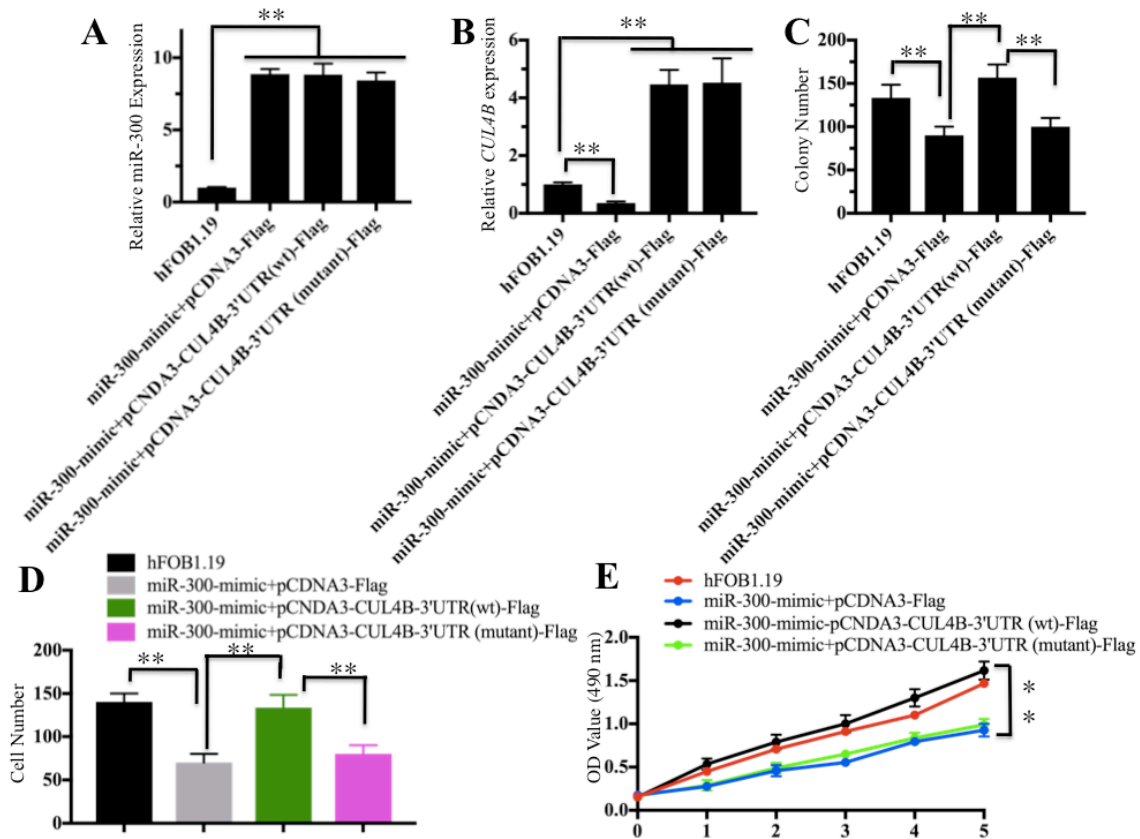

**Fig. S3 miR-300 specifically bond to the 3'UTR of CUL4B.**

The hFOB1.19 cells were transfected with the following combinations of plasmids: miR-300-mimic + pCDNA3-Flag; miR-300-mimic + pCDNA3-CUL4B-3'UTR (wt)-Flag, or miR-300-mimic + pCDNA3-CUL4B-3'UTR (mutant)-Flag, respectively. After 48 h, multiple studies were performed: miR-300 expression (A) and *CUL4B* mRNA (B), colony formation ability (C), cell invasion ability (D) and cell proliferation (E). hFOB1.19 cell line was used as a control. \*\*  $P < 0.001$ .

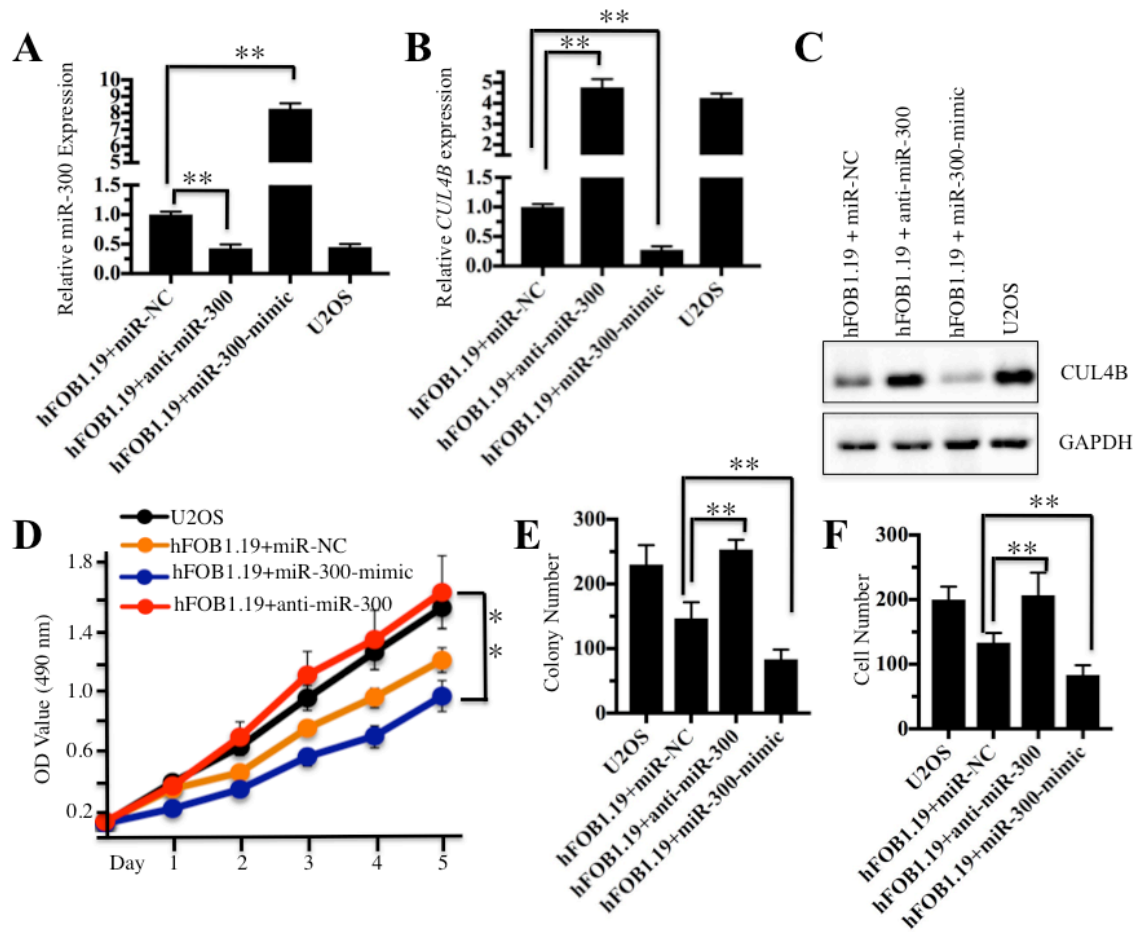

**Fig. S4 Downregulation of miR-300 in hFOB1.19 cells caused similar phenotypes to U2OS cells.**

The hFOB1.19 cells were transfected with miR-NC, anti-miR-300, or miR-300-mimic, respectively. After 48 h, multiple studies were performed: miR-300 expression (A) and mRNA (B) and protein levels (C) of CUL4B, cell proliferation (D), colony formation ability (E), as well as cell invasion ability (F). U2OS cells were used as control in these studies. \*\*  $P < 0.001$ .

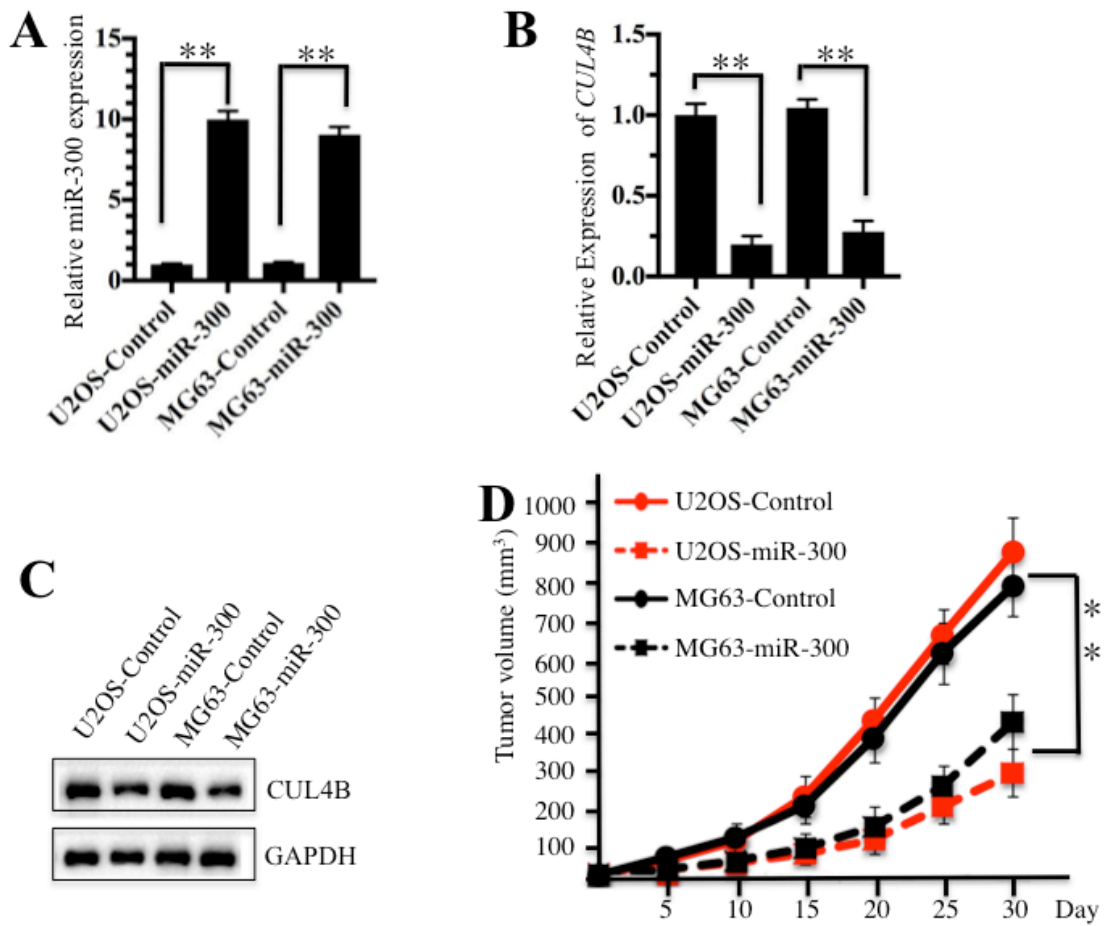

**Fig. S5 Overexpression of miR-300 in osteosarcoma cells caused significant growth inhibition.**

The U2OS and MG63 cells overexpressing pmR-ZsGreen1-miR-300 plasmid (U2OS-miR-300 and MG63-miR-300), and their relative controls transfected with pmR-ZsGreen1 empty vector (U2OS-Control and MG63-Control), were subjected to multiple studies including miR-300 expression (A) and mRNA (B) and protein levels (C) of CUL4B, as well as in vivo tumor formation assay (D). \*\*  $P < 0.001$ .

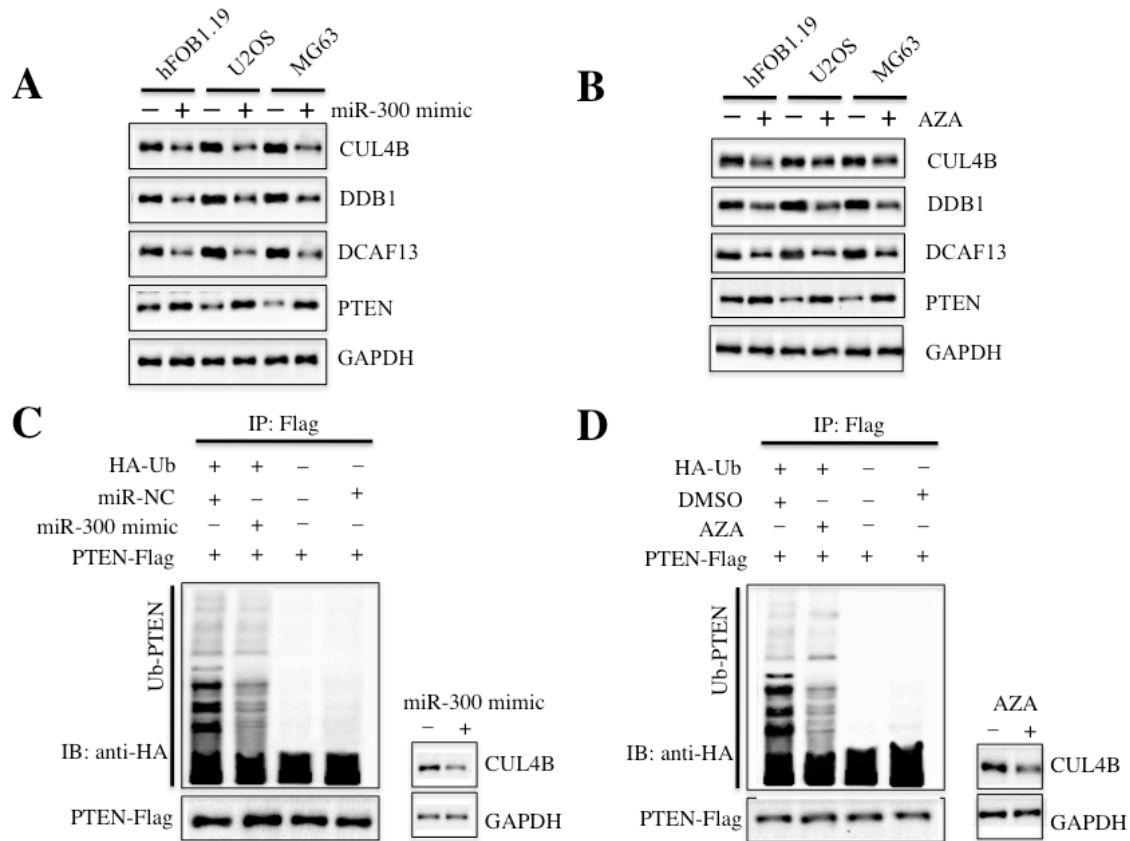

**Fig. S6 Overexpression of miR-300 or AZA treatment decreased the ubiquitination level of PTEN.**

(A) Effect of overexpression of miR-300 on the protein levels of CUL4B, DDB1, DCAF13 and PTEN. The hFOB1.19, U2OS, and MG63 cell lines were transfected with miR-300-mimic or its negative control miR-NC for 48 h, followed by detection of CUL4B, DDB1, DCAF13 and PTEN levels by western blotting. (B) Effect of AZA treatment on the protein levels of CUL4B, DDB1, DCAF13 and PTEN. The hFOB1.19, U2OS, and MG63 cell lines were primarily treated with DMSO or AZA (1  $\mu$ M), followed by detection of CUL4B, DDB1, DCAF13 and PTEN levels by western blotting. (C and D) Overexpression of miR-300 or AZA treatment decreased the ubiquitination level of PTEN *in vivo*. U2OS cells were first co-transfected with PTEN-Flag and HA-Ubiquitin, followed by miR-300 overexpression (C) or AZA treatment. After 48 h of incubation, cells were lysed, immunoprecipitated with anti-Flag antibody, and then probed with anti-HA antibody to detect ubiquitinated PTEN. The protein level of CUL4B

after these treatments is also indicated in the right panels of each figure.

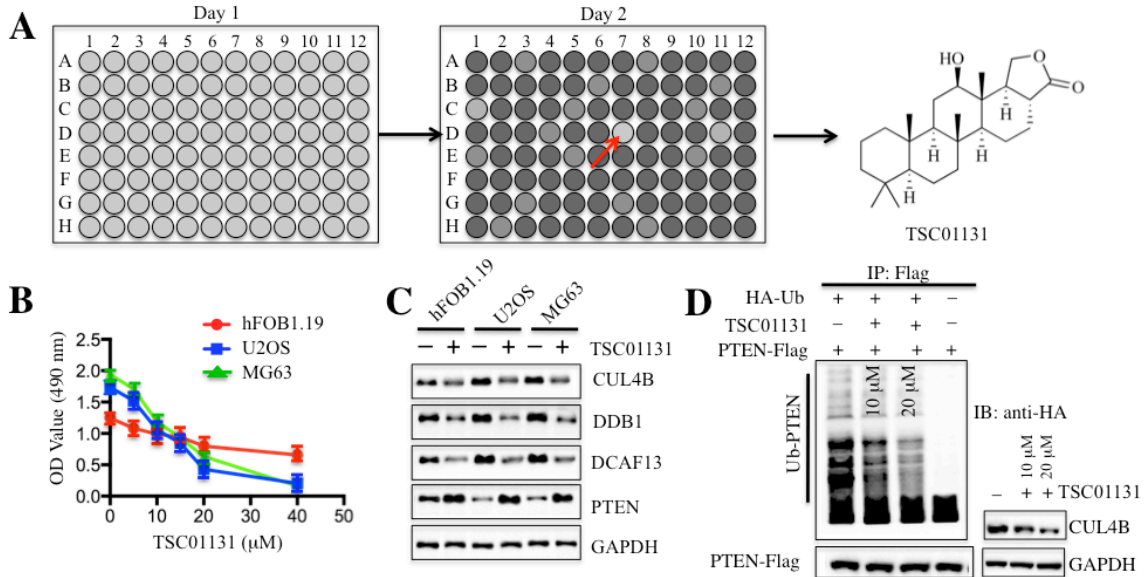

**Fig. S7 TSC01131 could specifically inhibit the CUL4B-DDB1 interaction.**

(A) Schematic representation of the screen for small molecules that disrupt the CUL4B-DDB1 interaction. The AH109 yeast cells expressing *pGADT7-CUL4B* and *pGBKT7-DDB1* were grown in 96-well plates at a density of OD<sub>600</sub>=0.1, and the SC-H/T/L medium was supplemented with the individual compound in each well. After 18 h of incubation at 30°C, cell density was measured at 600 nm with the Synergy HTX Multi-Mode Reader. Compounds that significantly inhibited cell growth (OD<sub>600</sub><0.2) were selected. The chemical structure of TSC01131 is indicated. (B) Effect of TSC01131 on cell proliferation. Different concentrations of TSC01131 (0, 5, 10, 15, 20 and 40 μM) were added into DMEM medium to evaluate the degree of cell proliferation, and cell viability was determined at 490 nm. (C) Effect of TSC01131 treatment on the protein levels of CUL4B, DDB1, DCAF13 and PTEN. The hFOB1.19, U2OS, and MG63 cell lines were primarily treated with DMSO or TSC01131 (10 μM), followed by the detection of CUL4B, DDB1, DCAF13 and PTEN levels by western blotting. (D) Treatment with TSC01131 decreased the ubiquitination level of PTEN *in vivo*. U2OS cells were first co-transfected with PTEN-Flag and HA-Ubiquitin for 48 h, followed by



treatment with TSC01131 for 6 h. Then, the cells were lysed, immunoprecipitated with anti-Flag antibody, and probed with anti-HA antibody to detect ubiquitinated PTEN.

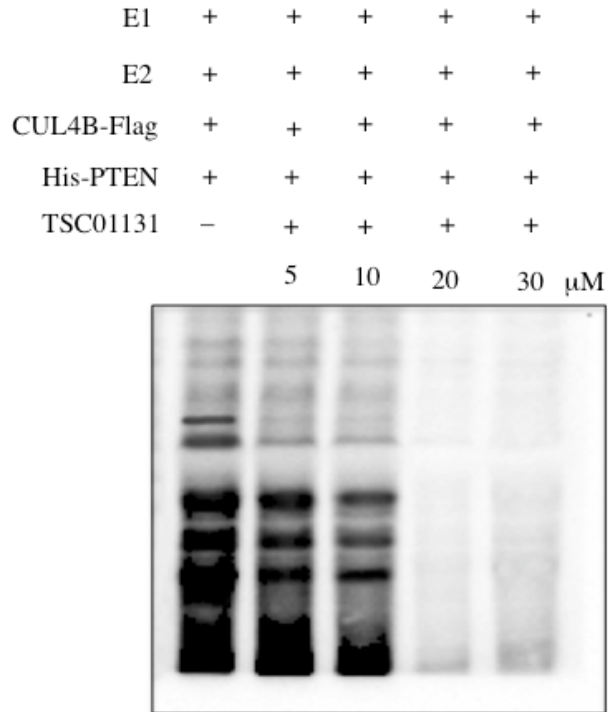

**Fig. S8 TSC01131 specifically inhibited the *in vitro* ubiquitination of PTEN.**

The purified His-PTEN protein was incubated with E1, E2, and CUL4B-Flag in ubiquitination reaction buffer, followed by treating with different concentrations of TSC01131 (5, 10, 20 or 30  $\mu$ M). The ubiquitination of PTEN was determined by immunoblotting with anti-PTEN.

**Supplementary Table-1. The candidate proteins interacting with DCAF13 in human osteosarcoma cells**

| <b>Accession Number</b> | <b>Protein ID</b>                                                      | <b>Symbol</b> | <b>Molecular Weight</b> | <b>MASCOT Score</b> |
|-------------------------|------------------------------------------------------------------------|---------------|-------------------------|---------------------|
| P60484                  | Phosphatase and tensin homolog<br>deleted on chromosome 10             | PTEN          | 47 kDa                  | 912                 |
| Q13620                  | Cullin 4B                                                              | CUL4B         | 104 kDa                 | 835                 |
| Q16531                  | Damage Specific DNA Binding<br>Protein 1                               | DDB1          | 127 kDa                 | 719                 |
| Q13601                  | Small Subunit Processome<br>Component Homolog                          | KRR1          | 44 kDa                  | 578                 |
| Q15269                  | Periodic tryptophan protein 2<br>homolog                               | PWP2          | 102 kDa                 | 404                 |
| O43818                  | Ribosomal RNA Processing 9                                             | RRP9          | 52 kDa                  | 315                 |
| P62877                  | RING-Box 1                                                             | RBX1          | 12 kDa                  | 224                 |
| Q9BVI4                  | Nucleolar Complex-Associated<br>Protein 4-Like Protein                 | NOC4L         | 58 kDa                  | 154                 |
| Q92466                  | Damage Specific DNA Binding<br>Protein 2                               | DDB2          | 48 kDa                  | 89                  |
| Q15843                  | Neural Precursor Cell Expressed,<br>Developmentally Downregulated<br>8 | NEDD8         | 9 kDa                   | 87                  |
| Q9Y2X3                  | Nucleolar Protein 58                                                   | NOP58         | 60 kDa                  | 86                  |
| P62081                  | Ribosomal Protein S7                                                   | RPS7          | 22 kDa                  | 85                  |
| Q96RS0                  | Trimethylguanosine Synthase                                            | TGS1          | 97 kDa                  | 85                  |
| Q9UG63                  | ATP Binding Cassette Subfamily<br>F Member 2                           | ABCF2         | 71 kDa                  | 83                  |
| Q9ULW3                  | Activator Of Basal Transcription                                       | ABT1          | 31 kDa                  | 82                  |

|        |                                                              |        |        |    |
|--------|--------------------------------------------------------------|--------|--------|----|
| P56377 | Adaptor Related Protein Complex<br>1 Sigma 2 Subunit         | AP1S2  | 19 kDa | 80 |
| P35226 | B Lymphoma Mo-MLV Insertion<br>Region 1                      | BMI1   | 37 kDa | 78 |
| Q8IY81 | FtsJ Homolog 3                                               | FTSJ3  | 97 kDa | 78 |
| P22087 | Fibrillarin                                                  | FBL    | 34 kDa | 77 |
| Q9NVP1 | DEAD-Box Helicase 18                                         | DDX18  | 75 kDa | 77 |
| P62273 | Ribosomal Protein S29                                        | RPS29  | 7 kDa  | 75 |
| Q9BRS2 | RIO Kinase 1                                                 | RIOK1  | 66 kDa | 74 |
| Q9ULX3 | NIN1/PSMD8 Binding Protein 1                                 | NOB1   | 47 kDa | 73 |
| Q8TED0 | U3 small nucleolar<br>RNA-associated Protein 15              | UTP15  | 58 kDa | 73 |
| Q9BVJ6 | U3 Small Nucleolar<br>RNA-Associated Protein 14<br>Homolog A | UTP14A | 88 kDa | 71 |
| Q12788 | Transducin Beta Like 3                                       | TBL3   | 89 kDa | 70 |
| Q96B26 | Exosome Component 8                                          | EXOSC8 | 30 kDa | 70 |
| Q9H4L4 | SUMO1/Sentrin/SMT3 Specific<br>Peptidase 3                   | SENP3  | 65 kDa | 68 |
| Q13868 | Exosome Component 2                                          | EXOSC2 | 33 kDa | 67 |
| Q9NQT5 | Exosome Component 3                                          | EXOSC3 | 30 kDa | 67 |
| Q9NPD3 | Exosome Component 4                                          | EXOSC4 | 26 kDa | 65 |
| P62249 | Ribosomal Protein S16                                        | RPS16  | 16 kDa | 65 |
| P62280 | Ribosomal Protein S11                                        | RPS11  | 18 kDa | 64 |
| Q9UET6 | FtsJ RNA Methyltransferase<br>Homolog 1                      | FTSJ1  | 36 kDa | 63 |
| P55769 | Non-Histone Chromosome<br>Protein 2-Like 1                   | NHP2L1 | 14 kDa | 63 |
| P62241 | Ribosomal Protein S8                                         | RPS8   | 24 kDa | 60 |
| P23396 | Ribosomal Protein S3                                         | RPS3   | 27 kDa | 60 |

|        |                                                       |        |         |    |
|--------|-------------------------------------------------------|--------|---------|----|
| Q969U6 | F-Box And WD Repeat Domain<br>Containing 5            | FBXW5  | 64 kDa  | 60 |
| P27694 | Replication Protein A1                                | RPA1   | 68 kDa  | 57 |
| Q9H0A0 | N-Acetyltransferase 10                                | NAT10  | 116 kDa | 56 |
| P42224 | Signal Transducer And Activator<br>Of Transcription 1 | STAT1  | 87 kDa  | 55 |
| P15884 | Transcription Factor 4                                | TCF4   | 71 kDa  | 55 |
| Q9NR30 | DEXD-Box Helicase 21                                  | DDX21  | 87 kDa  | 55 |
| Q562E7 | WD Repeat Domain 81                                   | WDR81  | 211 kDa | 53 |
| Q9BVP2 | G Protein Nucleolar 3                                 | GNL3   | 62 kDa  | 52 |
| O76021 | Ribosomal L1 Domain Containing<br>1                   | RSL1D1 | 55 kDa  | 52 |
| Q9BQ67 | Glutamate Rich WD Repeat<br>Containing 1              | GRWD1  | 49 kDa  | 52 |
| O43147 | Small G Protein Signaling<br>Modulator 2              | SGSM2  | 113 kDa | 52 |
| Q9BZG8 | Diphthamide Biosynthesis 1                            | DPH1   | 49 kDa  | 52 |
| O00541 | Pescadillo Ribosomal Biogenesis<br>Factor 1           | PES1   | 68 kDa  | 50 |
| Q13823 | G Protein Nucleolar 2                                 | GNL2   | 84 kDa  | 50 |
| Q53HL2 | Cell Division Cycle Associated 8                      | CDCA8  | 31 kDa  | 50 |
| Q14209 | E2F Transcription Factor 2                            | E2F2   | 48 kDa  | 50 |
| Q12830 | Bromodomain PHD Finger<br>Transcription Factor        | BPTF   | 338 kDa | 50 |
| O15381 | Nuclear VCP-Like                                      | NVL    | 95 kDa  | 50 |
| Q14872 | Metal Regulatory Transcription<br>Factor 1            | MTF1   | 81 kDa  | 50 |

---

**Supplementary Table-2. The predicted miRNAs that target the 3'-UTR of CUL4B  
in miRDB**

| <b>Target Rank</b> | <b>Target Score</b> | <b>miRNA Name</b> | <b>miRNA Sequence</b>    |
|--------------------|---------------------|-------------------|--------------------------|
| 1                  | 100                 | miR-300           | CCUGAGAAAAGGGCCAA        |
| 2                  | 99                  | miR-4531          | AUGGAGAAGGCUUCUGA        |
| 3                  | 99                  | miR-3977          | GUGCUUCAUCGUAAUUAACCUUA  |
| 4                  | 99                  | miR-6830-5p       | CCAAGGAAGGAGGCUGGACAUC   |
| 5                  | 97                  | miR-4659a-3p      | UUUCUUCUAGACAUGGCAACG    |
| 6                  | 97                  | miR-545-5p        | UCAGUAAAUGUUUAUUAGAUGA   |
| 7                  | 97                  | miR-153-5p        | UCAUUUUUGUGAUGUUGCAGCU   |
| 8                  | 97                  | miR-4659b-3p      | UUUCUUCUAGACAUGGCAGCU    |
| 9                  | 96                  | miR-561-3p        | CAAAGUUUAAGAUCUUGAAGU    |
| 10                 | 96                  | miR-381-3p        | AUACAAGGGCAAGCUCUCUGU    |
| 11                 | 96                  | miR-300           | UAUACAAGGGCAGACUCUCUCU   |
| 12                 | 94                  | miR-4776-3p       | CUUGCCAUCCUGGUCCACUGCAU  |
| 13                 | 94                  | miR-6885-3p       | CUUUGCUUCCUGCUCCCCUAG    |
| 14                 | 94                  | miR-7159-5p       | UUCAACAAGGGUGUAGGAUGG    |
| 15                 | 94                  | miR-8060          | CCAUGAAGCAGUGGGUAGGAGGAC |
| 16                 | 93                  | miR-3691-3p       | ACCAAGUCUGCGUCAUCCUCUC   |
| 17                 | 91                  | miR-3664-5p       | AACUCUGUCUUCACUCAUGAGU   |
| 18                 | 91                  | miR-4451          | UGGUAGAGCUGAGGACA        |
| 19                 | 90                  | miR-3671          | AUCAAAUAAGGACUAGUCUGCA   |
| 20                 | 90                  | miR-4482-3p       | UUUCUAUUUCUCAGUGGGGCUC   |
| 21                 | 88                  | miR-495-3p        | AAACAAACAUGGUGCACUUCUU   |
| 22                 | 88                  | miR-5688          | UAACAAACACCUGUAAAACAGC   |
| 23                 | 88                  | miR-4279          | CUCUCCUCCGGCUUC          |
| 24                 | 87                  | miR-4668-5p       | AGGGAAAAAAAAAAGGAUUUGUC  |
| 25                 | 86                  | miR-181a-2-3p     | ACCACUGACCGUUGACUGUACC   |

|    |    |              |                          |
|----|----|--------------|--------------------------|
| 26 | 86 | miR-5003-3p  | UACUUUUCUAGGUUGUUGGGG    |
| 27 | 86 | miR-4645-3p  | AGACAGUAGUUCUUGCCUGGUU   |
| 28 | 85 | let-7a-2-3p  | CUGUACAGCCUCCUAGCUUUC    |
| 29 | 85 | let-7g-3p    | CUGUACAGGCCACUGCCUUGC    |
| 30 | 85 | miR-5584-5p  | CAGGGAAAUGGGAAGAACUAGA   |
| 31 | 85 | miR-4766-5p  | UCUGAAAGAGCAGUUGGUGUU    |
| 32 | 85 | miR-4753-3p  | UUCUCUUUCUUUAGCCUUGUGU   |
| 33 | 84 | miR-4496     | GAGGAAACUGAAGCUGAGAGGG   |
| 34 | 83 | miR-544a     | AUUCUGCAUUUUUAGCAAGUUC   |
| 35 | 82 | miR-194-5p   | UGUAAACAGCAACUCCAUGUGGA  |
| 36 | 82 | miR-340-5p   | UUAUAAAAGCAAUGAGACUGAUU  |
| 37 | 82 | miR-4261     | AGGAAACAGGGACCCA         |
| 38 | 82 | miR-6848-3p  | GUGGUCUCUUGGCCCCAG       |
| 39 | 82 | miR-5582-3p  | UAAAACUUUAAGUGUGCCUAGG   |
| 40 | 82 | miR-421      | AUCAACAGACAUUAAUUGGGCGC  |
| 41 | 82 | miR-6843-3p  | AUGGUCUCCUGUUCUCUGCAG    |
| 42 | 81 | miR-3121-3p  | UAAAUAGAGUAGGCAAAGGACA   |
| 43 | 80 | miR-589-3p   | UCAGAACAAAUGCCGGUUCCCAGA |
| 44 | 80 | miR-548x-3p  | UAAAAACUGCAAUUACUUUC     |
| 45 | 80 | miR-548aj-3p | UAAAAACUGCAAUUACUUUUA    |
| 46 | 80 | miR-548am-3p | CAAAAACUGCAGUUACUUUUGU   |
| 47 | 80 | miR-548j-3p  | CAAAAACUGCAUUACUUUUGC    |
| 48 | 80 | miR-548aq-3p | CAAAAACUGCAAUUACUUUUGC   |
| 49 | 80 | miR-548ae-3p | CAAAAACUGCAAUUACUUUCA    |
| 50 | 80 | miR-548ah-3p | AAAAACUGCAGUUACUUUUGC    |
| 51 | 79 | miR-3617-3p  | CAUCAGCACCCUAUGUCCUUUCU  |
| 52 | 79 | miR-767-3p   | UCUGCUCAUACCCCAUGGUUUCU  |
| 53 | 79 | miR-4503     | UUUAAGCAGGAAAUAGAAUUUA   |
| 54 | 79 | miR-651-3p   | AAAGGAAAGUGUAUCCUAAAAG   |
| 55 | 78 | miR-3680-3p  | UUUUGCAUGACCCUGGGAGUAGG  |

---

|    |    |             |                          |
|----|----|-------------|--------------------------|
| 56 | 77 | miR-7154-5p | UUCAUGAACUGGGUCUAGCUUGG  |
| 57 | 75 | miR-6776-3p | CAACCACCACUGUCUCUCCCCAG  |
| 58 | 75 | miR-6768-5p | CACACAGGAAAAGCGGGGCCUG   |
| 59 | 75 | miR-548e-5p | CAAAAGCAAUCGCGGUUUUUGC   |
| 60 | 74 | miR-4311    | GAAAGAGAGCUGAGUGUG       |
| 61 | 74 | miR-5190    | CCAGUGACUGAGCUGGAGCCA    |
| 62 | 73 | miR-584-3p  | UCAGUUCCAGGCCAACCCAGGCU  |
| 63 | 72 | miR-664b-3p | UUCAUUUGCCUCCCAGCCUACA   |
| 64 | 72 | miR-579-3p  | UUCAUUUGGUAAUAAACCGCGAUU |
| 65 | 72 | miR-4282    | UAAAAUUUGCAUCCAGGA       |
| 66 | 71 | miR-527     | CUGCAAAGGGAAGCCCUUUC     |
| 67 | 71 | miR-450b-5p | UUUUGCAAUAUGUCCUGAAUA    |
| 68 | 71 | miR-561-5p  | AUCAAGGAUCUUAACUUUGCC    |
| 69 | 71 | miR-518a-5p | CUGCAAAGGGAAGCCCUUUC     |
| 70 | 70 | miR-5002-5p | AAUUUGGUUUCUGAGGCACUUAGU |
| 71 | 70 | miR-34a-3p  | CAAUCAGCAAGUAUACUGCCCU   |
| 72 | 69 | miR-548c-3p | CAAAAUCUCAAUUACUUUUGC    |
| 73 | 66 | miR-5094    | AAUCAGUGAAUGCCUUGAACCU   |
| 74 | 66 | miR-581     | UCUUGUGUUCUCUAGAUCAGU    |
| 75 | 66 | miR-648     | AAGUGUGCAGGGCACUGGU      |
| 76 | 65 | miR-6874-3p | CAGUUCUGCUGUUCUGACUCUAG  |
| 77 | 65 | miR-148b-5p | AAGUUCUGUUAUACACUCAGGC   |
| 78 | 64 | miR-3646    | AAAUGAAAUGAGCCCAGCCCA    |
| 79 | 63 | miR-3653-5p | CCUCCUGAUGAUUCUUCUUC     |
| 80 | 62 | miR-3065-5p | UCAACAAAUCACUGAUGCUGGA   |
| 81 | 61 | miR-1273e   | UUGCUUGAACCCAGGAAGUGGA   |
| 82 | 61 | miR-567     | AGUAUGUUCUUCAGGACAGAAC   |
| 83 | 59 | miR-6797-3p | UGCAUGACCCUCCCUCCCCAC    |
| 84 | 59 | miR-6076    | AGCAUGACAGAGGAGAGGUGG    |
| 85 | 59 | miR-876-3p  | UGGUGGUUUACAAAGUAAUUCA   |

---

|     |    |             |                          |
|-----|----|-------------|--------------------------|
| 86  | 58 | miR-2053    | GUGUUAUUAAAACCUCUAUUUAC  |
| 87  | 58 | miR-6762-3p | UGGCUGCUUCCCUUGGUCUCCAG  |
| 88  | 58 | miR-4253    | AGGGCAUGUCCAGGGGGU       |
| 89  | 58 | miR-4302    | CCAGUGUGGCUCAGCGAG       |
| 90  | 58 | miR-6862-5p | CGGGCAUGCUGGGAGAGACUUU   |
| 91  | 57 | miR-154-3p  | AAUCAUACACGGUUGACCUAUU   |
| 92  | 57 | miR-5011-5p | UAUAUAUACAGCCAUGCACUC    |
| 93  | 57 | miR-487a-3p | AAUCAUACAGGGACAUCCAGUU   |
| 94  | 56 | miR-647     | GUGGCUGCACUCACUCCUUC     |
| 95  | 56 | miR-942-5p  | UCUUCUCUGUUUUGGCCAUGUG   |
| 96  | 56 | miR-134-3p  | CCUGUGGGCCACCUAGUCACCAA  |
| 97  | 56 | miR-7158-5p | GGCUCAAUCUCUGGUCCUGCAGCC |
| 98  | 55 | miR-6809-3p | CUUCUCUUCUCUCCUCCAG      |
| 99  | 55 | miR-6826-3p | CUCCCCUCUCUUCCUGUUCAG    |
| 100 | 54 | miR-4483    | GGGGUGGUCUGUUGUUG        |
| 101 | 54 | miR-4680-5p | AGAACUCUUGCAGUCUUAGAUGU  |
| 102 | 54 | miR-1293    | UGGGUGGUCUGGAGAUUUGUGC   |
| 103 | 54 | miR-6832-5p | AGUAGAGAGGAAAAGUUAGGGUC  |
| 104 | 52 | miR-9-5p    | UCUUUGGUUAUCUAGCUGUAUGA  |
| 105 | 52 | miR-5197-3p | AAGAAGAGACUGAGUCAUCGAAU  |
| 106 | 52 | miR-4764-5p | UGGAUGUGGAAGGAGUUAUCU    |

---



**Supplementary Table-3. The clinicopathological features of 48 osteosarcoma patients and miR-300 expression**

| Characteristics    | Number of cases | Relative expression of miR-449c |           | P-value   |
|--------------------|-----------------|---------------------------------|-----------|-----------|
|                    |                 | Low (<0)                        | High (≥0) |           |
| <b>Gender</b>      |                 |                                 |           |           |
| Male               | 24              | 18                              | 6         | 0.7223    |
| Female             | 24              | 20                              | 4         |           |
| <b>Age</b>         |                 |                                 |           |           |
| ≥20                | 10              | 7                               | 3         | 0.7154    |
| <20                | 38              | 31                              | 7         |           |
| <b>Tumor size</b>  |                 |                                 |           |           |
| ≥12 cm             | 13              | 13                              | 0         | 0.034*    |
| <12                | 35              | 25                              | 10        |           |
| <b>MSTS stages</b> |                 |                                 |           |           |
| I                  | 14              | 4                               | 10        | <0.0001** |
| II/III/IV          | 34              | 34                              | 0         |           |

\*P < 0.05, \*\*P < 0.001

**Supplementary Table-4. Primers used for qRT-PCR**

| Gene    | Forward                     | Reverse                        |
|---------|-----------------------------|--------------------------------|
| β-Actin | 5'-CACCAACTGGGACGACAT-3'    | 5'-ACAGCCTGGATAGCAACG-3'       |
| CUL4B   | 5'-GGAGAACACTGCAGTCATTAG-3' | 5'-GCAGCATCAATTTGATACTGTCTG-3' |

**Supplementary Table-5. Primers used for qMSP**

| Gene   | Forward                            | Reverse                           |
|--------|------------------------------------|-----------------------------------|
| GAPDH  | 5'-CGCTTCTTTCCTTTCGC-3'            | 5'-TGCCATTCATTTCCTTCC-3'          |
| Island | 5'-TTTTTTTGTAAATTTGTGAATATATAATTGT | 5'-AAACTAACCTAAAACCAAACCTAACCC-3' |
